# Supplementary material for: Autophagy in endothelial cells regulates their haematopoiesis-supporting ability
Source: PubMed Central journal article supplement — eBioMedicine. 2020 Feb 27;53:102677. doi: 10.1016/j.ebiom.2020.102677 (PMC7047195; doi:10.1016/j.ebiom.2020.102677), 2020-02-27
Supplement: mmc1.pdf [file mmc1.pdf]

## Supplementary Materials

### Autophagy in endothelial cells regulates their haematopoiesis-supporting ability

**Authors:** Zhong-Shi Lyu<sup>1,2#</sup>, Xie-Na Cao<sup>1#</sup>, Qi Wen<sup>1</sup>, Xiao-Dong Mo<sup>1</sup>, Hong-Yan Zhao<sup>1</sup>, Yu-Hong Chen<sup>1</sup>, Yu Wang<sup>1</sup>, Ying-Jun Chang<sup>1</sup>, Lan-Ping Xu<sup>1</sup>, Xiao-Hui Zhang<sup>1</sup>, Yuan Kong<sup>1\*</sup>, Xiao-Jun Huang<sup>1,2,3\*</sup>

#Zhong-Shi Lyu and Xie-Na Cao are co-first authors.

\*Xiao-Jun Huang and Yuan Kong are co-correspondence authors.

### Supplementary methods

#### Real-time quantitative polymerase chain reaction (qRT-PCR)

The relative mRNA levels of *Beclin-1* (forward primer: 5'-CTGGACACTCAGCTCAACGTCA-3'; reverse primer: 5'-CTCTAGTGCCAGCTCCTTTAGC-3'), *JAG1* (forward primer: 5'-TGCTACAACCGTGCCAGTGACT-3'; reverse primer: 5'-TCAGGTGTGTCGTTGGAAGCCA-3'), *CSF-1* (forward primer: 5'-TGAGACACCTCTCCAGTTGCTG-3'; reverse primer: 5'-GCAATCAGGCTTGGTCACCACA-3'), *CSF-2* (forward primer: 5'-GGAGCATGTGAATGCCATCCAG-3'; reverse primer: 5'-CTGGAGGTCAAACATTTCTGAGAT-3'), *CSF-3* (forward primer: 5'-TCCAGGAGAAGCTGGTGAGTGA-3'; reverse primer: 5'-

CGCTATGGAGTTGGCTCAAGCA-3'), *ETS1* (forward primer: 5'-  
GAGTCAACCCAGCCTATCCAGA-3'; reverse primer: 5'-  
GAGCGTCTGATAGGACTCTGTG-3'), *IL-7* (forward primer: 5'-  
GACAGCATGAAAGAAATTGGTAGC-3'; reverse primer: 5'-  
CAACTTGCGAGCAGCACGGAAT-3'), *DLL1* (forward primer: 5'-  
TGCCTGGATGTGATGAGCAGCA-3'; reverse primer: 5'-  
ACAGCCTGGATAGCGGATACAC-3'), *THPO* (forward primer: 5'-  
CCAGAGGTTACCCCTTTCCTA-3'; reverse primer: 5'-  
CCAGAATGTCCTGTGCCTTGGT-3'), *CXCL-12* (forward primer: 5'-  
CTCCAAACTGTGCCCTTCAGA-3'; reverse primer: 5'-  
CTCCAAACTGTGCCCTTCAGA-3'), *VEGFR2* (forward primer: 5'-  
GGAACCTCACTATCCGCAGAGT-3'; reverse primer: 5'-  
CCAAGTTCGTCTTTTCCTGGGC-3') and *E-selectin* (forward primer: 5'-  
TGTTTGGCACTGTGTGCAAG-3'; reverse primer: 5'-  
TGGGAGCTTCACAGGTAGGT-3') between Beclin-1 knockdown group and  
control in HUVECs (N=6) were analyzed. Normalized levels of the *Beclin-1*,  
*CSF-1*, *CSF-2*, *CSF-3*, *JAG1*, *ETS1*, *IL-7*, *DLL1*, *THPO*, *CXCL-12*, *VEGFR2*  
and *E-selectin* ratios in the qRT-PCR assays were evaluated through  
comparisons with the *Actin beta* (*ACTB*) levels (forward primer: 5'-  
GATCATTGCTCCTCCTGAGC-3'; reverse primer: 5'-  
CGTCATACTCCTGCTTGCTG-3').

## Supplementary Figures

### Figure S1

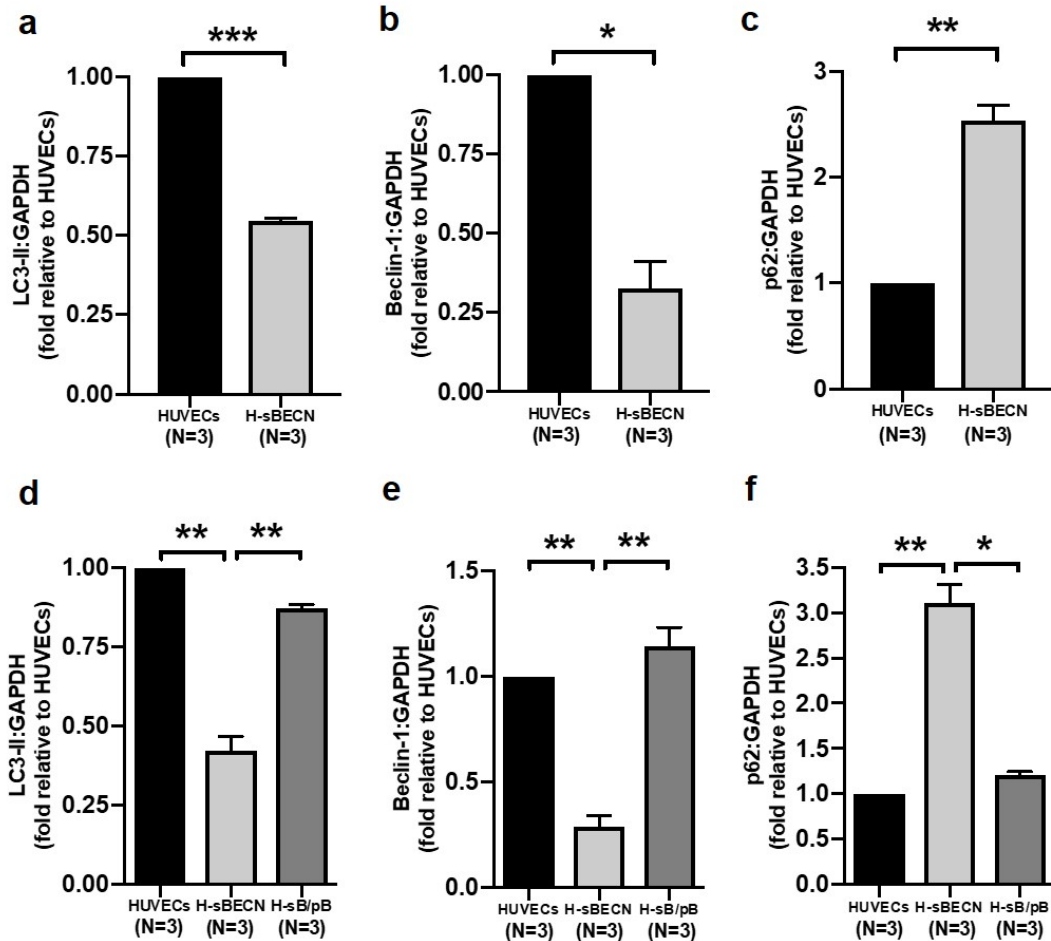

**Fig.S1: The quantitative analysis of western blots of intracellular LC3-II, Beclin-1 and p62. (a)** The quantitative analysis of LC3-II in the Beclin-1 knockdown group (H-sBECN) and the control group. **(b)** The quantitative analysis of Beclin-1 in the Beclin-1 knockdown group (H-sBECN) and the control group. **(c)** The quantitative analysis of p62 after Beclin-1 knockdown (H-sBECN) and overexpression (H-sB/pB) in HUVECs in the Beclin-1 knockdown group (H-sBECN) and the control group. **(d)** The quantitative analysis of LC3-II after

Beclin-1 knockdown (H-sBECN) and overexpression (H-sB/pB) in HUVECs and the control group. **(e)** The quantitative analysis of Beclin-1 after Beclin-1 knockdown (H-sBECN) and overexpression (H-sB/pB) in HUVECs and the control group. **(f)** The quantitative analysis of p62 after Beclin-1 knockdown (H-sBECN) and overexpression (H-sB/pB) in HUVECs and the control group. Wilcoxon's test for paired data was used to identify drug effects. All *P*-values <0.05 were considered significant and provided in the figure. \**P*<0.05, \*\**P*<0.005, \*\*\**P*<0.0005.

**Figure S2**

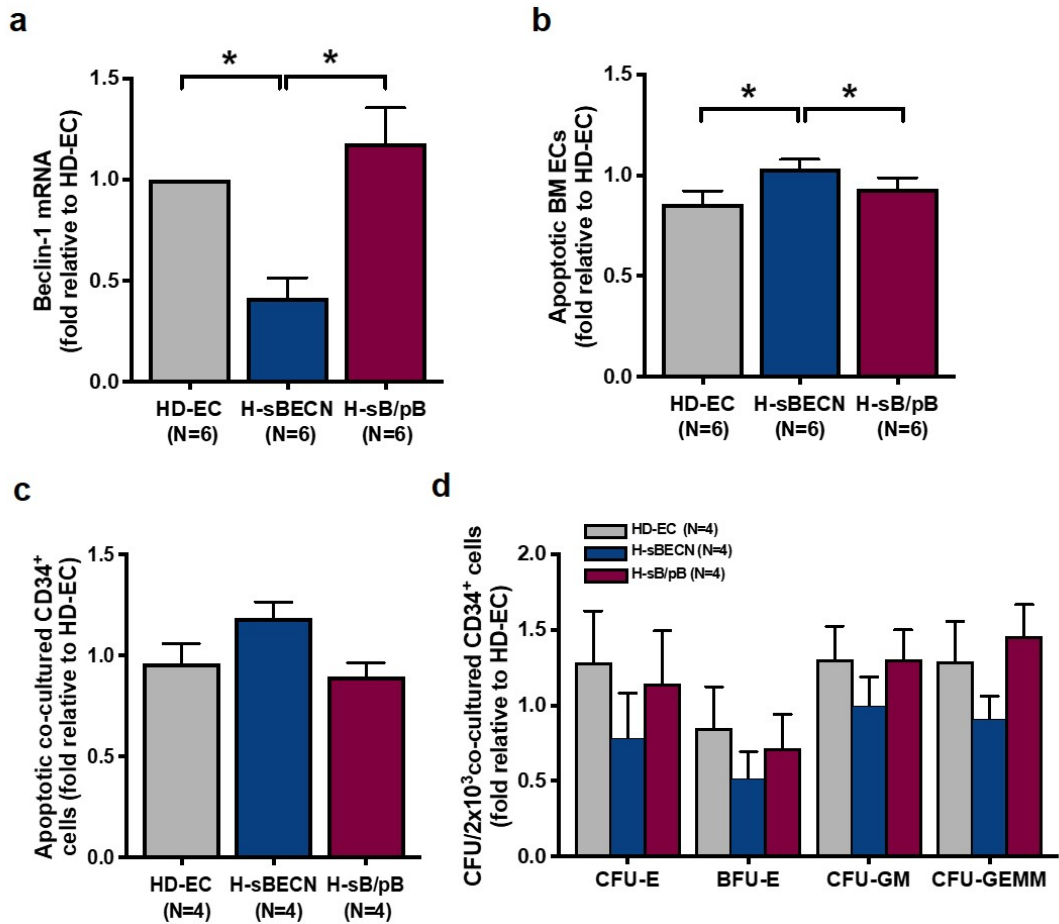

**Fig.S2: The impaired ability of primary bone marrow(BM) endothelial cells(ECs) derived from healthy donors was restored by activating autophagy via Beclin-1 upregulation. (a) *Beclin-1* mRNA levels were analysed by qRT-PCR after Beclin-1 knockdown (H-sBECN) and overexpression (H-sB/pB) in primary BM ECs derived from healthy donors(HD-EC). (b) The apoptosis rates of primary BM ECs in the H-sBECN, H-sB/pB and HD-EC groups were analysed by flow cytometry. (c) The apoptosis rates of BM CD34<sup>+</sup> cells and (d) the CFU plating efficiency of BM CD34<sup>+</sup> cells from healthy**

donors were analysed after 7 days of coculture with primary BM ECs in the H-sBECN, H-sB/pB and HD-EC groups. Wilcoxon's test for paired data was used to identify drug effects. All  $P$ -values  $<0.05$  were considered significant and are provided in the figure. \* $P<0.05$ , \*\* $P<0.005$ , \*\*\* $P<0.0005$ .

## Figure S3

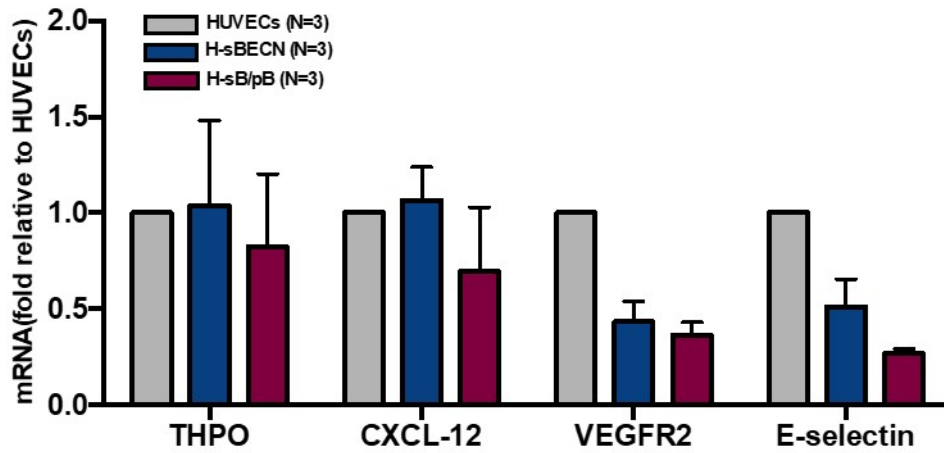

**Fig.S3: Haematopoiesis-regulating genes, which were not modified by Beclin-1 knockdown or Beclin-1 overexpression in HUVECs.** The relative mRNA levels of *THPO*, *CXCL-12*, *VEGFR2* and *E-selectin* in the H-sBECN, H-sB/pB and control groups were determined using qRT-PCR.

**Supplementary Table 1. Characteristics of allo-HSCT patients with PGF**

| <b>Characteristics</b>                                                       | <b>PGF* (N=40)</b> | <b>GGF* (N=40)</b> | <b>P-Value**</b> |
|------------------------------------------------------------------------------|--------------------|--------------------|------------------|
| BM evaluated time (post-HSCT days)                                           | 72(26-280)         | 70(24-282)         | 0.90             |
| <b>Blood cell count</b>                                                      |                    |                    |                  |
| Median WBC ( $\times 10^9/L$ ) (range)                                       | 2.04(0.10-5.10)    | 4.95(2.50-9.80)    | <0.0001          |
| Median ANC ( $\times 10^9/L$ ) (range)                                       | 1.20(0.00-3.30)    | 3.60(1.50-8.90)    | <0.0001          |
| Median Hb (g/L) (range)                                                      | 77(50-124)         | 118(80-157)        | <0.0001          |
| Median PLT ( $\times 10^9/L$ ) (range)                                       | 43(6-121)          | 120(50-215)        | <0.0001          |
| Age at HSCT (years, median, range)                                           | 36(18-61)          | 36(18-57)          | 0.82             |
| Gender (male/female)                                                         | 26/14              | 23/17              | 0.65             |
| Underlying disease                                                           |                    |                    | 1.00             |
| AML                                                                          | 18                 | 25                 |                  |
| ALL                                                                          | 14                 | 11                 |                  |
| MDS                                                                          | 8                  | 4                  |                  |
| Status at HSCT                                                               |                    |                    | 0.67             |
| Standard-risk                                                                | 27                 | 32                 |                  |
| High-risk                                                                    | 13                 | 8                  |                  |
| Source of stem cell                                                          |                    |                    | 1.00             |
| BM and PB                                                                    | 40                 | 40                 |                  |
| Transplanted total nucleated cell dose ( $\times 10^8/kg$ , median, range)   | 7.69(3.82-12.37)   | 7.89(3.98-12.52)   | 0.78             |
| Transplanted CD34 <sup>+</sup> cell dose ( $\times 10^6/kg$ , median, range) | 2.69(0.64-6.14)    | 2.79(0.76-5.69)    | 0.74             |
| Donor match                                                                  |                    |                    | 1.00             |
| HLA-identical sibling donor                                                  | 0                  | 0                  |                  |
| HLA-partially matched related donor                                          | 40                 | 40                 |                  |
| Sex mismatch                                                                 |                    |                    | 0.54             |
| Female to male                                                               | 9                  | 6                  |                  |
| Female to female                                                             | 4                  | 3                  |                  |
| Male to female                                                               | 9                  | 13                 |                  |
| Male to male                                                                 | 18                 | 18                 |                  |
| ABO mismatch                                                                 |                    |                    | 0.35             |
| No                                                                           | 27                 | 17                 |                  |
| Minor                                                                        | 2                  | 5                  |                  |
| Major                                                                        | 11                 | 18                 |                  |
| Pre-HSCT cycles of chemotherapy                                              | 4 (0-7)            | 4(0-7)             | 0.67             |
| Conditioning                                                                 |                    |                    | 1.00             |
| BU/CY                                                                        | 0                  | 0                  |                  |
| BU/CY+ATG                                                                    | 40                 | 40                 |                  |



|                                                 |          |          |      |
|-------------------------------------------------|----------|----------|------|
| History of CMV reactivation                     | 29       | 23       | 0.10 |
| Onset of CMV reactivation (days, median, range) | 23(9-89) | 19(7-75) | 0.54 |
| CMV reactivation treated with ganciclovir       | 12       | 12       | 1.00 |
| History of GvHD                                 | 18       | 21       | 0.82 |
| Onset of aGvHD (days, median, range)            | 14(2-73) | 10(2-72) | 0.90 |

\* Group matching criteria included age at HSCT ( $\pm 1$  years), pre-HSCT cycles of chemotherapy ( $\pm 1$  cycle), disease status at HSCT and BM microenvironment evaluated time after HSCT ( $\pm 5$  days). For each case, one GGF control was randomly selected from the same cohort at which the PGF occurred (“risk-set sampling”).

\*\* The continuous variables were compared using the Mann-Whitney U-test, and the differences in frequency between the 2 groups were compared using the chi-square test. The criterion for statistical significance was  $P < 0.05$ .

**Abbreviations:** allo-HSCT indicates allogeneic hematopoietic stem cell transplantation; aGvHD, acute graft-versus-host disease; PGF, poor graft function; GGF, good graft function; BM, bone marrow; PB, peripheral blood; WBC, white blood cell; ANC, absolute neutrophil cell; Hb, hemoglobin; PLT, platelet; AML, acute myelogenous leukemia; ALL, acute lymphocytic leukemia; MDS, myelodysplastic syndrome; HLA, human leukocyte antigen; CMV, cytomegalovirus.
